# Supplementary material for: Access to Functional Handwashing Facilities and Associated Factors among South Sudanese Refugees in Rhino Camp Settlement, Northwestern Uganda
Source: PubMed Central journal article supplement (PMC7149417; doi:10.1155/2020/3089063), 2020-03-30
Supplement: 3089063.f1.pdf [file 3089063.f1.pdf]

### Supplementary 1: Questionnaire

| <b>HOUSEHOLD IDENTIFICATION PARTICULARS (HI)</b>                    |                                                                      |                                                                                                                             |                                          |
|---------------------------------------------------------------------|----------------------------------------------------------------------|-----------------------------------------------------------------------------------------------------------------------------|------------------------------------------|
| <b>NO.</b>                                                          | <b>QUESTIONS</b>                                                     | <b>RESPONSE</b>                                                                                                             |                                          |
| HI01                                                                | Date of interview<br>(day/month/2018)                                | ___/___/2018                                                                                                                |                                          |
| HI02                                                                | Start time                                                           |                                                                                                                             |                                          |
| HI03                                                                | Village                                                              |                                                                                                                             |                                          |
| <b>HI04</b>                                                         | <b>Household Sample Number</b>                                       |                                                                                                                             |                                          |
| HI05                                                                | Name of data collector                                               |                                                                                                                             |                                          |
| <b>HOUSEHOLD SOCIOECONOMIC AND DEMOGRAPHIC CHARACTERISTICS (HD)</b> |                                                                      |                                                                                                                             |                                          |
| <b>NO.</b>                                                          | <b>QUESTIONS</b>                                                     | <b>RESPONSE AND CODING CATEGORIES<br/>(Circle the code that is given by the respondent)</b>                                 | <b>SKIP PATTERNS AND IMPORTANT NOTES</b> |
| HD01                                                                | Gender                                                               | 1= Female<br>2= Male                                                                                                        |                                          |
| HD02                                                                | How old are you? (as of last birthday, record age in complete years) | _____ years                                                                                                                 |                                          |
| HD03                                                                | To which tribe do you belong?                                        | 1= Dinka<br>2= Nuer<br>3= Kuku<br>4= Kakwa<br>5= Madi<br>6= Siluk<br>7= Other (specify)<br>_____                            |                                          |
| HD04                                                                | What is your religion?                                               | 1= Catholic<br>2= Anglican<br>3= Muslim<br>4= Pentecostal<br>5= Seventh Day Adventists (SDA)<br>6= Other (specify)<br>_____ |                                          |
| HD05                                                                | What is your marital status?                                         | 1= Single<br>2= Married/cohabiting<br>3= Widowed<br>4= Divorced/separated                                                   |                                          |
| HD06                                                                | Have you ever attended school?                                       | 1= Yes<br>2= No                                                                                                             | → Skip to HD08                           |
| HD07                                                                | What is your highest level of education attained?                    | 1= Primary (P1 to P7)<br>2= O level (S1 to S4)<br>3= A level (S5 to S6)                                                     |                                          |

|                                                                                              |                                                                                    |                                                                                                                                                                                                                                                                                                                                                                                                                       |                      |
|----------------------------------------------------------------------------------------------|------------------------------------------------------------------------------------|-----------------------------------------------------------------------------------------------------------------------------------------------------------------------------------------------------------------------------------------------------------------------------------------------------------------------------------------------------------------------------------------------------------------------|----------------------|
|                                                                                              |                                                                                    | 4= Tertiary/ University                                                                                                                                                                                                                                                                                                                                                                                               |                      |
| HD08                                                                                         | How many people live in your household? (include both children and adults)         |                                                                                                                                                                                                                                                                                                                                                                                                                       |                      |
| HD09                                                                                         | How long have you lived in Rhino camp?                                             | _____ (years)<br>_____ (Months)                                                                                                                                                                                                                                                                                                                                                                                       |                      |
| <b>THE NEXT QUESTIONS ASK ABOUT DIARRHEAL DISEASES (DD)</b>                                  |                                                                                    |                                                                                                                                                                                                                                                                                                                                                                                                                       |                      |
| DD01                                                                                         | During the past 30 days has anyone in your family suffered from diarrheal diseases | 1= Yes<br>2= No                                                                                                                                                                                                                                                                                                                                                                                                       |                      |
| DD02                                                                                         | What do you think can cause diarrhea?                                              | 1=Bad/ dirty water<br>2= Bad/dirty food<br>3= Poor hygiene<br>4= Feces/ defecating in the open<br>5= Dirty hands<br>6= Germs<br>7= Flies<br>8= Other (specify)<br>_____<br>9= Do not know                                                                                                                                                                                                                             |                      |
| DD03                                                                                         | Do you think diarrhea can be prevented?                                            | 1= Yes<br>2= No<br>3= Don't know                                                                                                                                                                                                                                                                                                                                                                                      | → Skip to HWA01      |
| DD04                                                                                         | What are some of the ways of preventing diarrhea?                                  | 1= Wash hands<br>2= Use soap<br>3= Use toilet facility to defecate<br>4= Dispose children's feces in toilet<br>5= Bury feces<br>6= Drink clean water<br>7= Store water safely<br>8= Treat water (boil, filter, chlorinate)<br>9= Prepare food hygienically<br>10= Dispose of rubbish in pit<br>11= Breast feeding<br>12= Measles vaccination<br>13= Good nutrition<br>14= Other (specify)<br>_____<br>15= Do not know |                      |
| <b>THE NEXT QUESTIONS ASK ABOUT THE HAND WASHING FACILITIES AT THE HOUSEHOLD LEVEL (HWA)</b> |                                                                                    |                                                                                                                                                                                                                                                                                                                                                                                                                       |                      |
| <b>NO.</b>                                                                                   | <b>QUESTIONS</b>                                                                   | <b>RESPONSE AND</b>                                                                                                                                                                                                                                                                                                                                                                                                   | <b>SKIP PATTERNS</b> |

|       |                                                                                                                                                               | <b>CODING CATEGORIES<br/>(Circle the code that corresponds with the response given by the respondent)</b>                |                        |
|-------|---------------------------------------------------------------------------------------------------------------------------------------------------------------|--------------------------------------------------------------------------------------------------------------------------|------------------------|
| HWA01 | Does the household have a functioning hand washing station (Please observe only)                                                                              | 1= Yes<br>2= No                                                                                                          | ➤ <b>Skip to HWA08</b> |
| HWA02 | What type of handwashing station is it?                                                                                                                       | 1= Oxfam Buckets<br>2= Tippy taps<br>3= Bush proof hand washing containers<br>4= Hand washing bags<br>5= Other (specify) |                        |
| HWA03 | Where is the handwashing facility located?                                                                                                                    | 1= Next to the toilet<br>2= Next to the kitchen<br>3= Next to the house<br>4= Other (specify)                            |                        |
| HWA04 | Is the handwashing facility supplied with water?<br>(Please observe to see if there is water within the water storage container of the hand washing facility) | 1= Yes<br>2= No                                                                                                          |                        |
| HWA05 | Is their soap at hand washing facility (Please observe)                                                                                                       | 1= Yes<br>2= No                                                                                                          |                        |
| HWA06 | Does the hand washing facility include resources for hygienic hand drying?                                                                                    | 1= Yes<br>2= No                                                                                                          |                        |
| HWA07 | How many people use the handwashing station                                                                                                                   | _____ people                                                                                                             |                        |
| HWA08 | If there is no hand washing facility within the household. What is the main reason for it being absent?                                                       | _____<br>_____<br>_____                                                                                                  |                        |
| HWA09 | What is your household main source of water?                                                                                                                  | 1=Own tap<br>2=Borehole<br>3=Stream/river<br>4=Public tap<br>5=Protected well<br>6=Unprotected well<br>7=Other (specify) |                        |

|       |                                                                                                                                                       |                                                                                                                                                                                                                                                                                                                                             |                |
|-------|-------------------------------------------------------------------------------------------------------------------------------------------------------|---------------------------------------------------------------------------------------------------------------------------------------------------------------------------------------------------------------------------------------------------------------------------------------------------------------------------------------------|----------------|
| HWA10 | What is the distance to the main source of water (15 minutes= 1km)                                                                                    | 1= Within 500m<br>2= 1 to 2km<br>3= Other (Specify)                                                                                                                                                                                                                                                                                         |                |
| HWA11 | Do you use any soap in your household?                                                                                                                | 1= Yes<br>2= No                                                                                                                                                                                                                                                                                                                             | ➤Skip to KHW01 |
| HWA12 | What is your main source of soap?                                                                                                                     | 1= Retail shops<br>2= Donations from organizations<br>3= Other (specify)                                                                                                                                                                                                                                                                    |                |
| HWA13 | What is soap reserved for in your household (high priority usage areas)? Rank in order of priority 1,2,3,4<br>(1=very high 2=High 3= Low 4= Very low) | Laundry.....<br>Washing dishes.....<br>Bathing.....<br>Handwashing.....                                                                                                                                                                                                                                                                     |                |
| HWA14 | Where does your household prefer keeping the soap?                                                                                                    | 1= Place on a shelf in the kitchen or on top of a kitchen cupboard<br>2= Keep soap under furniture such as bed<br>3= Keep soap on a dish rack near the toilet<br>4= No specific place for washing hands<br>5= Far from main house<br>6= At communal handwashing facility<br>7= At a place where children cannot reach<br>8= Other (specify) |                |
| HWA15 | Is soap always available for hand washing at critical times of handwashing?                                                                           | 1= Yes<br>2= No                                                                                                                                                                                                                                                                                                                             | ➤Skip to KHW01 |
| HWA16 | What are the main reasons for not using soap for handwashing at the critical times?                                                                   | 1= Cost of soap (cannot afford)<br>2= Not available in area shops<br>3= No soap is available in the house<br>4= Other (specify)                                                                                                                                                                                                             |                |
| HWA17 | In case soap is not available, what do you use for hand washing?                                                                                      | 1= Ash<br>2= Mud<br>3= Nothing<br>4= Other (specify)                                                                                                                                                                                                                                                                                        |                |

|                                                                                                             |                                                                                 |                                                                                                                                                                      |  |
|-------------------------------------------------------------------------------------------------------------|---------------------------------------------------------------------------------|----------------------------------------------------------------------------------------------------------------------------------------------------------------------|--|
|                                                                                                             |                                                                                 |                                                                                                                                                                      |  |
| HWA18                                                                                                       | What would it take you to make handwashing with soap at critical times a habit? | 1= Ease access of water<br>2= Able to afford soap<br>3= Ease access to ash and water<br>4= Other (specify)                                                           |  |
| <b>THE NEXT QUESTIONS ASK ABOUT KNOWLEDGE ABOUT HAND WASHING WITH SOAP (KHW)</b>                            |                                                                                 |                                                                                                                                                                      |  |
| KHW01                                                                                                       | When are the critical times when handwashing with soap should be done?          | 1= After visiting the toilet<br>2= Before handling food<br>3= After handling food<br>4= After cleaning babies bottom<br>5= Other (specify)<br><hr/> 6= Do not know   |  |
| KHW02                                                                                                       | What is the primary purpose of hand hygiene?                                    | 1= To reduce germs on hands<br>2= To keep hands clean<br>3= To keep nails clean<br>4= Do not know<br>5= To keep the hands smooth<br>6= To avoid diseases<br>7= Other |  |
| KHW03                                                                                                       | Does Human feaces contain germs?                                                | 1= Yes<br>2= No<br>3= Do not know                                                                                                                                    |  |
| KHW04                                                                                                       | Does human urine contain germs?                                                 | 1= Yes<br>2= No<br>3= Do not know                                                                                                                                    |  |
| KHW05                                                                                                       | Does poor hand washing cause disease?                                           | 1= Yes<br>2= No<br>3= Do not know                                                                                                                                    |  |
| KHW06                                                                                                       | Is water only enough for hand washing?                                          | 1= Yes<br>2= No<br>3= Do not know                                                                                                                                    |  |
| KHW07                                                                                                       | Is it necessary to wash hands with soap?                                        | 1= Yes<br>2= No<br>3= Do not know                                                                                                                                    |  |
| KHW08                                                                                                       | If, yes, why would you use soap                                                 | 1= Personal care<br>2= Attraction<br>3= Health (freedom from germs and diseases)<br>4= Other (specify)<br><hr/>                                                      |  |
| <b>THE NEXT QUESTIONS ASK ABOUT PARTICIPATION IN HOUSEHOLD VISITS AIMED AT PROMOTING HAND WASHING (HHP)</b> |                                                                                 |                                                                                                                                                                      |  |

|       |                                                                                                                     |                                                                                                                                                                                                                                                                               |                        |
|-------|---------------------------------------------------------------------------------------------------------------------|-------------------------------------------------------------------------------------------------------------------------------------------------------------------------------------------------------------------------------------------------------------------------------|------------------------|
| HHP01 | Have you received a household visit from a hygiene promoter to educate you about hand washing in the last 6 months? | 1= Yes<br>2= No                                                                                                                                                                                                                                                               | → <b>End Interview</b> |
| HHP02 | Which hand washing information is mostly disseminated during the household visits?                                  | 1=Why you should wash hands<br>2=Why you should use soap to wash hands<br>3=Why you should wash hands with clean water<br>4=When you should wash hands<br>5=What to do if you witness a person not washing hands after a critical time<br>6=Location to place soap<br>7=Other |                        |
| HHP03 | Did they demonstrate to you how to wash your hands properly?                                                        | 1= Yes<br>2= No                                                                                                                                                                                                                                                               |                        |
| HHP04 | Did they demonstrate to how to build your hand washing station?                                                     | 1= Yes<br>2= No                                                                                                                                                                                                                                                               |                        |
| HHP05 | Did they come with any materials like educational posters, charts about handwashing in any of their visits?         | 1= Yes<br>2= No                                                                                                                                                                                                                                                               |                        |
| HHP06 | In your opinion how would you rate the household visits by the hygiene promoters?                                   | 1= Excellent<br>2= Good<br>3= Fair<br>4= Bad/poor<br>5= Very poor<br>6= Do not know                                                                                                                                                                                           |                        |
